# Supplementary material for: The population genomics of rhesus macaques (Macaca mulatta) based on whole-genome sequences
Source: HighWire-hosted journal article supplement (doi:10.1101/gr.204255.116), 2016-10-17
Supplement: Supplemental_Table_S5.xlsx [file Supplemental_Table_S5.xlsx]

## Sheet: sheet1
Human hg19							Rhesus rhemac2				Nucleotide identity			Population level					Chinese CNPRC		Wild caught		Indian CNPRC		Cayo		New England		Oregon		SNPRC		Tulane		Wisconsin		Yerkes
Chrom	Position	Ref	Alt	Gene_Symbol	HGMD_ACC_NUM	HGMD_disease	#CHROM	POS	REF	ALT	Ensembl Rhesus-Human Homology Type	Ensembl percent human gene identical to rhesus gene	Ensembl percent rhesus gene identical to human gene	ref|alt	ref|ref	alt|alt	Freq Ref	Freq Alt	Freq alt	number of animals with alt homo	Freq alt	number of animals with alt homo	Freq alt	number of animals with alt homo	Freq alt	number of animals with alt homo	Freq alt	number of animals with alt homo	Freq alt	number of animals with alt homo	Freq alt	number of animals with alt homo	Freq alt	number of animals with alt homo	Freq alt	number of animals with alt homo	Freq alt	number of animals with alt homo
1	94502756	G	A	ABCA4	CM012036	Fundus flavimaculatus	1	97041552	G	A	ortholog_one2one	96	98	16	117	0	0.93985	0.0601504	0.166667	0	0.166667	0	0	0	0.0714286	0	0.0357143	0	0.0882353	0	0	0	0.0263158	0	0.0757576	0	0.0714286	0
1	94486905	C	T	ABCA4	CM015088	Stargardt disease	1	97025733	C	T	ortholog_one2one	96	98	1	132	0	0.996241	0.0037594	0	0	0.166667	0	0	0	0	0	0	0	0	0	0	0	0	0	0	0	0	0
1	94496039	C	T	ABCA4	CM990050	Stargardt disease	1	97034873	C	T	ortholog_one2one	96	98	0	132	1	0.992481	0.0075188	0	0	0.333333	1	0	0	0	0	0	0	0	0	0	0	0	0	0	0	0	0
7	87101971	G	A	ABCB4	CM122249	Low phospholipid associated cholelithiasis	3	129784571	C	T	ortholog_one2one	96	95	0	132	1	0.992481	0.0075188	0.166667	1	0	0	0	0	0	0	0	0	0	0	0	0	0	0	0	0	0	0
16	16313545	C	T	ABCC6	CS063238	Pseudoxanthoma elasticum	20	15928874	C	T	NA	NA	NA	25	105	3	0.883459	0.116541	0	0	0.333333	1	0.0714286	0	0.178571	1	0.0714286	0	0.176471	1	0	0	0.105263	0	0.121212	0	0.142857	0
16	67693137	T	C	ACD,PARD6A,RLTPR,ENKD1	CM150698	Melanoma	20	65970117	T	C	ortholog_one2one,ortholog_one2one,ortholog_one2one,ortholog_one2one	93,99,91,95	92,98,93,95	3	130	0	0.988722	0.0112782	0	0	0	0	0	0	0	0	0	0	0	0	0	0	0.0263158	0	0.0151515	0	0.0714286	0
22	21340117	G	A	AIFM3,LZTR1	CS140923	Schwannomatosis	10	64917177	C	T	ortholog_one2one,ortholog_one2one	99,93	99,93	1	132	0	0.996241	0.0037594	0	0	0	0	0	0	0	0	0	0	0	0	0	0	0	0	0.0151515	0	0	0
14	21162157	G	A	ANG,RNASE4	CM085237	Amyotrophic lateral sclerosis	7	83431543	G	A	NA,ortholog_one2one	NA,97	NA,97	1	132	0	0.996241	0.0037594	0.0833333	0	0	0	0	0	0	0	0	0	0	0	0	0	0	0	0	0	0	0
5	112179557	A	G	APC	CM080066	Colorectal adenoma	6	109162956	A	G	ortholog_one2one	98	95	28	101	4	0.864662	0.135338	0	0	0	0	0.178571	1	0.428571	3	0.0714286	0	0.0882353	0	0.0833333	0	0.105263	0	0.106061	0	0.142857	0
5	112179674	G	A	APC	CM080057	Colorectal adenoma	6	109163073	G	A	ortholog_one2one	98	95	28	101	4	0.864662	0.135338	0	0	0	0	0.178571	1	0.428571	3	0.0714286	0	0.0882353	0	0.0833333	0	0.105263	0	0.106061	0	0.142857	0
2	21255379	C	T	APOB	CM148038	Hypercholesterolaemia	13	20959421	C	T	ortholog_one2one	95	94	38	93	2	0.842105	0.157895	0	0	0	0	0.0357143	0	0.392857	1	0.142857	0	0.176471	0	0.25	0	0.105263	0	0.151515	1	0.214286	0
9	35657785	G	A	ARHGEF39,CCDC107,RMRP	CR021396	Cartilage-Hair hypoplasia	15	41866637	C	T	ortholog_one2one,ortholog_one2one,NA	85,91,NA	87,88,NA	1	132	0	0.996241	0.0037594	0	0	0	0	0	0	0	0	0.0357143	0	0	0	0	0	0	0	0	0	0	0
11	108122700	T	C	ATM	CM023329	Breast cancer susceptibility to	14	106834818	T	C	ortholog_one2one	98	94	2	131	0	0.992481	0.0075188	0	0	0.166667	0	0.0357143	0	0	0	0	0	0	0	0	0	0	0	0	0	0	0
13	52523859	G	A	ATP7B	CM004606	Wilson disease	17	30771793	G	A	ortholog_one2one	97	94	1	132	0	0.996241	0.0037594	0.0833333	0	0	0	0	0	0	0	0	0	0	0	0	0	0	0	0	0	0	0
20	3063428	C	A	AVP	CM023340	Diabetes insipidus central	10	36392706	C	A	NA	NA	NA	40	86	7	0.796992	0.203008	0	0	0	0	0.178571	0	0.107143	0	0.25	2	0.294118	1	0.25	0	0.236842	1	0.242424	3	0.0714286	0
11	62381825	G	A	B3GAT3,ROM1,EML3	CM104430	PRPH2-associated macular dystrophy modifier	14	11478111	C	T	ortholog_one2one,ortholog_one2one,ortholog_one2one	88,96,85	87,95,83	13	119	1	0.943609	0.056391	0	0	0	0	0	0	0.178571	1	0.0357143	0	0.0882353	0	0.0833333	0	0.0789474	0	0.030303	0	0	0
11	61719380	C	T	BEST1	CS109045	Bestrophinopathy	14	12081945	G	A	ortholog_one2one	86	83	13	120	0	0.951128	0.0488722	0	0	0	0	0.0357143	0	0.0357143	0	0	0	0.147059	0	0.166667	0	0.0263158	0	0.0454545	0	0	0
17	41246147	C	T	BRCA1	CM1411271	Breast cancer	16	53228056	C	T	ortholog_one2one	93	92	1	132	0	0.996241	0.0037594	0	0	0.166667	0	0	0	0	0	0	0	0	0	0	0	0	0	0	0	0	0
17	41223021	G	A	BRCA1	CM950152	Ovarian cancer	16	53202885	G	A	ortholog_one2one	93	92	0	132	1	0.992481	0.0075188	0	0	0.333333	1	0	0	0	0	0	0	0	0	0	0	0	0	0	0	0	0
17	41243940	C	T	BRCA1	CM042676	Prostate cancer	16	53225846	T	C	ortholog_one2one	93	92	33	91	9	0.808271	0.191729	0.916667	5	1	3	0.142857	0	0.0714286	0	0.178571	0	0.205882	1	0.0833333	0	0.236842	0	0.0909091	0	0	0
13	32930633	C	T	BRCA2	CM012590	Breast and/or ovarian cancer	17	11727916	C	T	ortholog_one2one	93	91	7	126	0	0.973684	0.0263158	0.25	0	0.166667	0	0.0357143	0	0	0	0.0357143	0	0.0294118	0	0	0	0	0	0	0	0	0
13	32930609	C	T	BRCA2	CM002245	Breast cancer	17	11727892	C	T	ortholog_one2one	93	91	1	132	0	0.996241	0.0037594	0	0	0	0	0	0	0	0	0	0	0	0	0	0	0	0	0.0151515	0	0	0
13	32929234	A	G	BRCA2	CM023888	Ocular melanoma	17	11726474	A	G	ortholog_one2one	93	91	62	49	22	0.601504	0.398496	0	0	0	0	0.428571	2	0.607143	6	0.392857	1	0.264706	0	0.333333	0	0.447368	5	0.378788	4	0.785714	4
13	32937521	G	A	BRCA2	CM004715	Breast cancer	17	11734965	A	G	ortholog_one2one	93	91	41	2	90	0.169173	0.830827	0.916667	5	1	3	0.857143	10	0.785714	8	0.821429	10	0.794118	10	0.75	3	0.815789	12	0.833333	23	0.928571	6
11	36615034	G	A	C11orf74,RAG2,RAG1	CM010087	Atypical SCID/Omenn syndrome	14	35250853	C	T	ortholog_one2one,ortholog_one2one,ortholog_one2one	90,98,98	90,98,98	1	132	0	0.996241	0.0037594	0	0	0	0	0	0	0	0	0	0	0.0294118	0	0	0	0	0	0	0	0	0
12	7177455	C	T	C1S	CM016095	Complement C1S deficiency	11	7275605	C	T	ortholog_one2one	94	94	1	132	0	0.996241	0.0037594	0	0	0.166667	0	0	0	0	0	0	0	0	0	0	0	0	0	0	0	0	0
6	32006951	C	T	C4B,TNXB,CYP21A2,C4B-AS1	CM130870	Adrenal hyperplasia	4	31664244	C	T	ortholog_one2many,ortholog_one2one,ortholog_one2one,NA	96,80,96,NA	59,97,96,NA	13	120	0	0.951128	0.0488722	0	0	0.333333	0	0.0357143	0	0	0	0.0714286	0	0	0	0.0833333	0	0.0789474	0	0.0454545	0	0.0714286	0
6	32006291	C	T	C4B,TNXB,CYP21A2,C4B-AS1	CM920227	Non-classic 21-hydroxylase deficiency	4	31663585	C	T	ortholog_one2many,ortholog_one2one,ortholog_one2one,NA	96,80,96,NA	59,97,96,NA	12	121	0	0.954887	0.0451128	0.0833333	0	0.166667	0	0	0	0.142857	0	0	0	0.0588235	0	0	0	0.0789474	0	0.0151515	0	0	0
8	11614506	A	G	C8orf49,GATA4	CM107551	Atrial septal defect	8	8983227	T	C	NA,ortholog_one2one	NA,98	NA,98	17	115	1	0.928571	0.0714286	0	0	0	0	0.0357143	0	0.142857	0	0.107143	1	0.0588235	0	0.0833333	0	0.0263158	0	0.0757576	0	0.142857	0
17	58234014	G	A	CA4	CM072913	Retinitis pigmentosa	16	46395190	C	T	ortholog_one2one	84	85	1	132	0	0.996241	0.0037594	0	0	0	0	0	0	0	0	0.0357143	0	0	0	0	0	0	0	0	0	0	0
19	13428124	C	T	CACNA1A	CM072914	Episodic ataxia 2	19	12999835	C	T	ortholog_one2one	94	79	1	132	0	0.996241	0.0037594	0	0	0	0	0	0	0	0	0	0	0.0294118	0	0	0	0	0	0	0	0	0
11	119169166	G	A	CBL	CM140995	Noonan-like syndrome	14	117711445	G	A	ortholog_one2one	99	99	2	131	0	0.992481	0.0075188	0	0	0	0	0	0	0	0	0	0	0	0	0	0	0.0263158	0	0.0151515	0	0	0
10	73483839	G	A	CDH23,C10orf105	CM118626	Usher syndrome 1	9	65273465	C	T	ortholog_one2one,NA	32,NA	94,NA	1	132	0	0.996241	0.0037594	0	0	0	0	0.0357143	0	0	0	0	0	0	0	0	0	0	0	0	0	0	0
12	58145379	T	C	CDK4,MARCH9,TSPAN31	CM973318	Melanoma	11	54840566	T	C	ortholog_one2one,ortholog_one2one,ortholog_one2one	100,99,100	100,99,100	31	102	0	0.883459	0.116541	0.0833333	0	0.333333	0	0.0357143	0	0	0	0.178571	0	0.147059	0	0.0833333	0	0.131579	0	0.151515	0	0.0714286	0
12	58145431	G	A	CDK4,MARCH9,TSPAN31	CM960267	Melanoma	11	54840618	G	A	ortholog_one2one,ortholog_one2one,ortholog_one2one	100,99,100	100,99,100	17	116	0	0.93609	0.0639098	0	0	0	0	0	0	0	0	0.0714286	0	0.117647	0	0.0833333	0	0.0789474	0	0.0909091	0	0.0714286	0
22	17687997	C	T	CECR1	CM141990	Polyarteritis nodosa systemic & cutaneous	10	61853926	C	T	ortholog_one2one	90	89	1	132	0	0.996241	0.0037594	0	0	0	0	0	0	0	0	0	0	0	0	0	0	0	0	0.0151515	0	0	0
7	117232481	G	A	CFTR	CM000668	Cystic fibrosis	3	154919952	G	A	ortholog_one2one	98	98	13	119	1	0.943609	0.056391	0	0	0	0	0.0357143	0	0.0357143	0	0.0357143	0	0.0882353	0	0	0	0.105263	1	0.0454545	0	0.142857	0
15	68504191	C	T	CLN6	CM112974	Neuronal ceroid lipofuscinosis 4A aut. rec.	7	46811588	C	T	ortholog_one2one	98	90	6	126	1	0.969925	0.0300752	0	0	0	0	0.0714286	1	0	0	0	0	0	0	0	0	0.0263158	0	0.0454545	0	0.142857	0
22	19195771	G	A	CLTCL1	CM124319	Autism	10	63252063	G	A	ortholog_one2one	95	96	2	131	0	0.992481	0.0075188	0	0	0	0	0	0	0	0	0.0357143	0	0	0	0	0	0.0263158	0	0	0	0	0
2	228176114	G	T	COL4A3	CS951387	Alport syndrome	12	91202162	G	T	ortholog_one2one	93	85	1	132	0	0.996241	0.0037594	0	0	0.166667	0	0	0	0	0	0	0	0	0	0	0	0	0	0	0	0	0
2	228128640	C	T	COL4A3	CM1310542	Deafness	12	91154478	C	T	ortholog_one2one	93	85	1	132	0	0.996241	0.0037594	0	0	0.166667	0	0	0	0	0	0	0	0	0	0	0	0	0	0	0	0	0
3	48619778	C	T	COL7A1,MIR711	CM083608	Epidermolysis bullosa dystrophica	2	87894458	G	A	ortholog_one2one,ortholog_one2one	95100	92100	1	132	0	0.996241	0.0037594	0	0	0	0	0.0357143	0	0	0	0	0	0	0	0	0	0	0	0	0	0	0
1	15772198	C	T	CTRC	CM080168	Pancreatitis alcohol-related	1	18187077	C	T	ortholog_one2one	60	77	1	132	0	0.996241	0.0037594	0	0	0	0	0	0	0	0	0	0	0	0	0.0833333	0	0	0	0	0	0	0
2	38301940	C	T	CYP1B1-AS1,CYP1B1	CM014341	Glaucoma primary congenital	13	38048222	C	T	NA,ortholog_one2one	NA,94	NA,94	37	88	8	0.800752	0.199248	0.833333	4	0.5	1	0.107143	0	0.392857	3	0.142857	0	0.0882353	0	0.166667	0	0.105263	0	0.136364	0	0.285714	0
2	242695318	G	A	D2HGDH	CM101388	D-2-hydroxyglutaric aciduria	12	105678239	G	A	ortholog_one2one	96	93	1	132	0	0.996241	0.0037594	0	0	0	0	0	0	0	0	0	0	0	0	0	0	0	0	0.0151515	0	0	0
11	686986	G	A	DEAF1	CM145122	White matter disease intellectual disability & microcephaly	14	497969	G	A	ortholog_one2one	94	79	1	132	0	0.996241	0.0037594	0	0	0	0	0	0	0	0	0	0	0.0294118	0	0	0	0	0	0	0	0	0
1	98157332	G	A	DPYD	CM970422	Dihydropyrimidine dehydrogenase deficiency	1	100737052	G	A	ortholog_one2one	98	98	2	131	0	0.992481	0.0075188	0	0	0	0	0	0	0.0357143	0	0	0	0	0	0	0	0	0	0	0	0.0714286	0
11	103070036	T	C	DYNC2H1	CM133156	Asphyxiating thoracic dystrophy	14	101803853	T	C	NA	NA	NA	13	120	0	0.951128	0.0488722	0	0	0	0	0.107143	0	0.0357143	0	0	0	0.147059	0	0	0	0.0263158	0	0.0454545	0	0	0
2	71886110	C	T	DYSF	CM116706	Muscular dystrophy limb girdle / Miyoshi myopathy	13	71917904	C	T	ortholog_one2one	94	91	1	132	0	0.996241	0.0037594	0	0	0	0	0	0	0	0	0	0	0	0	0	0	0.0263158	0	0	0	0	0
4	187197492	G	A	F11	CM0910289	Factor XI deficiency	5	178396211	G	A	ortholog_one2one	84	75	1	132	0	0.996241	0.0037594	0	0	0.166667	0	0	0	0	0	0	0	0	0	0	0	0	0	0	0	0	0
4	187205275	G	A	F11-AS1,F11	CM076173	Factor XI deficiency	5	178406659	G	A	NA,ortholog_one2one	NA,84	NA,75	14	119	0	0.947368	0.0526316	0.166667	0	0	0	0	0	0.214286	0	0.0357143	0	0.0294118	0	0	0	0.0263158	0	0.030303	0	0.0714286	0
13	113773073	G	A	F7,F10	CM090963	Factor VII deficiency	17	93240302	G	A	ortholog_one2one,ortholog_one2one	85,94	85,93	2	131	0	0.992481	0.0075188	0	0	0	0	0	0	0	0	0	0	0	0	0	0	0.0263158	0	0.0151515	0	0	0
9	97869488	G	A	FANCC	CM060989	Fanconi anaemia	15	106920101	G	A	ortholog_one2one	91	91	50	77	6	0.766917	0.233083	0	0	0	0	0.25	2	0.214286	0	0.25	0	0.294118	3	0.0833333	0	0.236842	0	0.272727	1	0.285714	0
17	39977272	C	T	FKBP10,NT5C3B	CM130010	Osteogenesis imperfecta / Bruck syndrome	16	51916246	C	T	ortholog_one2one,ortholog_one2one	98,98	98,73	1	132	0	0.996241	0.0037594	0	0	0	0	0	0	0	0	0	0	0	0	0	0	0.0263158	0	0	0	0	0
9	130580616	A	G	FPGS,ENG	CM062606	Haemorrhagic telangiectasia 1	15	98758369	T	C	ortholog_one2one,ortholog_one2one	94,94	94,55	8	124	1	0.962406	0.037594	0	0	0	0	0.0357143	0	0.0714286	0	0	0	0.0294118	0	0	0	0.0789474	1	0.0454545	0	0	0
8	104330926	C	T	FZD6	CM132595	Nail dystrophy	8	105837155	C	T	ortholog_one2one	98	98	1	132	0	0.996241	0.0037594	0	0	0	0	0	0	0	0	0	0	0	0	0	0	0	0	0.0151515	0	0	0
17	78082625	G	A	GAA	CM110560	Glycogen storage disease 2 late-onset	16	75552761	G	A	ortholog_one2one	96	94	1	132	0	0.996241	0.0037594	0.0833333	0	0	0	0	0	0	0	0	0	0	0	0	0	0	0	0	0	0	0
17	78090897	G	A	GAA	CM129631	Glycogen storage disease 2 late-onset	16	75561647	A	G	ortholog_one2one	96	94	61	15	57	0.342105	0.657895	1	6	1	3	0.785714	9	0.571429	5	0.678571	6	0.647059	7	0.5	0	0.710526	10	0.590909	11	0.428571	0
17	78078888	G	A	GAA,CCDC40	HM090034	Glycogen storage disease 2	16	75548258	G	A	ortholog_one2one,ortholog_one2one	96,94	94,76	1	132	0	0.996241	0.0037594	0	0	0	0	0	0	0	0	0	0	0.0294118	0	0	0	0	0	0	0	0	0
17	78078931	G	A	GAA,CCDC40	CS040146	Glycogen storage disease 2	16	75548301	A	G	ortholog_one2one,ortholog_one2one	96,94	94,76	61	44	28	0.56015	0.43985	0.666667	3	0.5	1	0.428571	2	0.357143	3	0.535714	4	0.382353	3	0.25	0	0.5	5	0.454545	7	0.285714	0
9	34649424	G	A	GALT,IL11RA	CM950556	Galactosaemia	15	42874476	C	T	ortholog_one2one,ortholog_one2one	93,96	93,96	1	132	0	0.996241	0.0037594	0.0833333	0	0	0	0	0	0	0	0	0	0	0	0	0	0	0	0	0	0	0
19	13008590	C	T	GCDH,SYCE2	CM960716	Glutaricacidaemia I	19	12566473	C	T	ortholog_one2one,ortholog_one2one	98,87	98,84	1	132	0	0.996241	0.0037594	0	0	0	0	0	0	0.0357143	0	0	0	0	0	0	0	0	0	0	0	0	0
17	42429455	C	T	GRN,FAM171A2	CM062773	Frontotemporal dementia	16	54450362	C	T	ortholog_one2one,NA	93,NA	69,NA	1	132	0	0.996241	0.0037594	0	0	0.166667	0	0	0	0	0	0	0	0	0	0	0	0	0	0	0	0	0
19	49468581	C	T	GYS1,BAX,FTL	CR031002	Hyperferritinaemia-cataract syndrome	19	55247888	C	T	ortholog_one2one,ortholog_one2one,ortholog_one2one	99,83,97	99,73,97	8	125	0	0.969925	0.0300752	0	0	0	0	0.0357143	0	0	0	0.0357143	0	0.0588235	0	0	0	0.0263158	0	0.0454545	0	0	0
19	49468583	C	T	GYS1,BAX,FTL	CR061335	Hyperferritinaemia-cataract syndrome	19	55247890	C	T	ortholog_one2one,ortholog_one2one,ortholog_one2one	99,83,97	99,73,97	9	124	0	0.966165	0.0338346	0	0	0	0	0	0	0.178571	0	0	0	0	0	0	0	0.0789474	0	0.0151515	0	0	0
17	48246530	G	A	HILS1,SGCA	CM031359	Muscular dystrophy limb girdle	16	34407358	G	A	NA,ortholog_one2one	NA,97	NA,97	1	132	0	0.996241	0.0037594	0	0	0	0	0	0	0	0	0	0	0	0	0	0	0.0263158	0	0	0	0	0
1	24143976	C	T	HMGCL	CM091356	3-hydroxy-3-methylglutaric aciduria	1	26426565	C	T	ortholog_one2one	91	91	1	132	0	0.996241	0.0037594	0	0	0	0	0	0	0	0	0	0	0.0294118	0	0	0	0	0	0	0	0	0
1	24123417	G	A	HMGCL,LYPLA2,GALE	CM128763	Galactosaemia epimerase deficiency	1	26405747	G	A	ortholog_one2one,ortholog_one2one,ortholog_one2one	91,93,98	91,94,98	1	132	0	0.996241	0.0037594	0.0833333	0	0	0	0	0	0	0	0	0	0	0	0	0	0	0	0	0	0	0
12	121416612	C	T	HNF1A-AS1,HNF1A	CM082857	Diabetes MODY3	11	122017474	C	T	NA,ortholog_one2one	NA,98	NA,27	1	132	0	0.996241	0.0037594	0	0	0	0	0	0	0	0	0	0	0	0	0	0	0	0	0.0151515	0	0	0
20	43043159	G	A	HNF4A	CM043848	Diabetes mellitus type 2	10	20035980	C	T	ortholog_one2one	94	98	3	130	0	0.988722	0.0112782	0	0	0.166667	0	0.0357143	0	0	0	0	0	0	0	0	0	0	0	0.0151515	0	0	0
12	122295335	T	C	HPD	CM003889	Hawkinsinuria	11	122947696	C	T	ortholog_one2one	97	97	25	107	1	0.898496	0.101504	0	0	0	0	0.107143	0	0.0357143	0	0.178571	0	0.0588235	0	0	0	0.157895	0	0.121212	0	0.142857	1
1	119964976	C	G	HSD3B2	CM040434	Idiopathic hypospadias	1	122301091	C	G	ortholog_one2one	95	96	1	132	0	0.996241	0.0037594	0.0833333	0	0	0	0	0	0	0	0	0	0	0	0	0	0	0	0	0	0	0
12	102796022	A	T	IGF1	CR033689	Insulin-like growth factor deficiency	11	103593297	A	T	ortholog_one2one	97	97	2	131	0	0.992481	0.0075188	0	0	0	0	0	0	0	0	0.0357143	0	0	0	0.0833333	0	0	0	0	0	0	0
1	67861342	A	G	IL12RB2	CM993347	Atopy	1	70182589	G	A	ortholog_one2one	94	94	2	131	0	0.992481	0.0075188	0.166667	0	0	0	0	0	0	0	0	0	0	0	0	0	0	0	0	0	0	0
3	121712238	C	T	ILDR1	CM110962	Hearing impairment autosomal recessive	2	42001427	C	T	ortholog_one2one	97	97	27	104	2	0.883459	0.116541	0	0	0	0	0.142857	0	0.142857	0	0.142857	0	0	0	0.166667	0	0.210526	1	0.121212	1	0.0714286	0
11	2181258	C	T	INS-IGF2,TH,INS	CS120217	Diabetes neonatal	14	2169054	C	T	NA,ortholog_one2one,ortholog_one2one	NA,96,88	NA,83,83	1	132	0	0.996241	0.0037594	0	0	0.166667	0	0	0	0	0	0	0	0	0	0	0	0	0	0	0	0	0
19	7267652	G	A	INSR	CM021100	Leprechaunism	19	7138588	G	A	ortholog_one2many	92	22	1	132	0	0.996241	0.0037594	0	0	0.166667	0	0	0	0	0	0	0	0	0	0	0	0	0	0	0	0	0
17	73754367	G	A	ITGB4,GALK1	CM993835	Galactokinase deficiency	16	71071470	G	A	ortholog_one2many,ortholog_one2one	98,89	35,88	1	132	0	0.996241	0.0037594	0	0	0.166667	0	0	0	0	0	0	0	0	0	0	0	0	0	0	0	0	0
21	35742806	C	T	KCNE2,SMIM11	CM055291	Long QT syndrome	3	12195367	G	A	ortholog_one2one,ortholog_one2one	87,97	94,97	1	131	1	0.988722	0.0112782	0.0833333	0	0.333333	1	0	0	0	0	0	0	0	0	0	0	0	0	0	0	0	0
11	74168451	C	T	KCNE3	CM056611	Atrial fibrillation familial	14	72629061	C	T	ortholog_one2one	95	95	1	132	0	0.996241	0.0037594	0	0	0.166667	0	0	0	0	0	0	0	0	0	0	0	0	0	0	0	0	0
11	74168313	C	T	KCNE3	CM086422	Brugada syndrome	14	72628923	C	T	ortholog_one2one	95	95	1	132	0	0.996241	0.0037594	0.0833333	0	0	0	0	0	0	0	0	0	0	0	0	0	0	0	0	0	0	0
11	2610043	G	A	KCNQ1	CM043853	Long QT syndrome	14	2598865	G	A	ortholog_one2one	98	93	1	132	0	0.996241	0.0037594	0	0	0	0	0	0	0	0	0	0	0	0	0	0	0	0	0.0151515	0	0	0
12	49434742	G	A	KMT2D	CM146865	Kabuki syndrome	11	46169949	G	A	ortholog_one2one	97	85	1	132	0	0.996241	0.0037594	0	0	0	0	0	0	0	0	0	0	0	0	0	0	0	0	0.0151515	0	0	0
6	129601217	C	T	LAMA2	CM1310244	Cardiomyopathy dilated type 1A	4	134621626	G	A	ortholog_one2one	97	95	1	132	0	0.996241	0.0037594	0	0	0	0	0	0	0	0	0.0357143	0	0	0	0	0	0	0	0	0	0	0
19	11210979	G	A	LDLR	CM994424	Hypercholesterolaemia	19	10916125	G	A	ortholog_one2one	91	90	7	126	0	0.973684	0.0263158	0	0	0	0	0.0357143	0	0	0	0	0	0.0294118	0	0.0833333	0	0.0263158	0	0.0454545	0	0	0
18	47091749	C	T	LIPG	CM132394	Reduced lipase activity	18	42606220	C	T	ortholog_one2one	98	98	4	129	0	0.984962	0.0150376	0	0	0	0	0	0	0	0	0	0	0	0	0	0	0	0	0.0606061	0	0	0
18	2925359	C	T	LPIN2	CM082927	Psoriasis	18	11237896	G	A	ortholog_one2one	99	99	2	131	0	0.992481	0.0075188	0.0833333	0	0.166667	0	0	0	0	0	0	0	0	0	0	0	0	0	0	0	0	0
11	68125147	C	T	LRP5	CM041034	Exudative vitreoretinopathy	14	6358548	G	A	ortholog_one2one	94	57	1	132	0	0.996241	0.0037594	0.0833333	0	0	0	0	0	0	0	0	0	0	0	0	0	0	0	0	0	0	0
16	89986304	G	A	MC1R,TUBB3	CM1111330	Melanoma	20	88043452	G	A	ortholog_one2one,ortholog_one2one	91100	91100	2	131	0	0.992481	0.0075188	0	0	0	0	0	0	0	0	0	0	0	0	0	0	0	0	0.030303	0	0	0
18	13885109	G	A	MC2R	CM002358	Glucocorticoid deficiency	18	915791	C	T	ortholog_one2one	97	96	1	132	0	0.996241	0.0037594	0	0	0.166667	0	0	0	0	0	0	0	0	0	0	0	0	0	0	0	0	0
1	161276599	T	C	MPZ	HM070059	Charcot-Marie-Tooth disease 1b	1	139921051	T	C	ortholog_one2one	96	99	2	131	0	0.992481	0.0075188	0	0	0	0	0.0357143	0	0	0	0	0	0.0294118	0	0	0	0	0	0	0	0	0
11	47364234	C	T	MYBPC3	CM032598	Cardiomyopathy hypertrophic	14	24776946	G	A	ortholog_one2one	96	96	5	128	0	0.981203	0.018797	0	0	0	0	0.0357143	0	0	0	0	0	0	0	0	0	0.0263158	0	0.030303	0	0.0714286	0
10	69881845	C	A	MYPN	CM122987	Cardiomyopathy hypertrophic	9	69125228	G	T	ortholog_one2one	97	97	22	110	1	0.909774	0.0902256	0	0	0	0	0.178571	1	0.107143	0	0.0714286	0	0.0882353	0	0	0	0.131579	0	0.0909091	0	0	0
1	160318821	G	A	NCSTN	CM125932	Acne inversa familial	1	138967247	G	A	ortholog_one2one	99	99	1	132	0	0.996241	0.0037594	0.0833333	0	0	0	0	0	0	0	0	0	0	0	0	0	0	0	0	0	0	0
18	77170472	C	T	NFATC1	CM1211180	Tricuspid atresia	18	72714773	C	T	ortholog_one2one	95	94	1	132	0	0.996241	0.0037594	0.0833333	0	0	0	0	0	0	0	0	0	0	0	0	0	0	0	0	0	0	0
9	139390585	C	T	NOTCH1	CM083740	Aortic valve disease	15	1800237	G	A	ortholog_one2one	96	95	1	132	0	0.996241	0.0037594	0	0	0	0	0	0	0	0	0	0	0	0	0	0	0	0	0.0151515	0	0	0
19	15302649	C	T	NOTCH3	CM025913	CADASIL	19	14786949	C	T	ortholog_one2one	98	93	1	132	0	0.996241	0.0037594	0	0	0	0	0	0	0	0	0	0	0	0	0	0	0.0263158	0	0	0	0	0
18	21118536	G	A	NPC1	CM015189	Niemann-Pick disease C	18	16553114	G	A	ortholog_one2one	96	96	29	101	3	0.868421	0.131579	0	0	0	0	0.214286	0	0.214286	1	0.107143	0	0.0588235	0	0	0	0.157895	1	0.0909091	0	0.428571	1
18	21116700	A	G	NPC1,C18orf8	CM990946	Niemann-Pick disease C	18	16550621	A	G	ortholog_one2one,ortholog_one2one	96,93	96,93	1	132	0	0.996241	0.0037594	0	0	0	0	0	0	0	0	0	0	0	0	0	0	0	0	0.0151515	0	0	0
1	5927943	G	A	NPHP4	CM125782	Cardiovascular malformations	1	8859166	G	A	ortholog_one2one	96	96	14	118	1	0.93985	0.0601504	0.166667	0	0.166667	0	0.0357143	0	0	0	0.107143	0	0.117647	1	0.0833333	0	0	0	0.0606061	0	0	0
1	5951029	G	A	NPHP4	CM051575	Nephronophthisis 4	1	8881072	G	A	ortholog_one2one	96	96	2	131	0	0.992481	0.0075188	0.166667	0	0	0	0	0	0	0	0	0	0	0	0	0	0	0	0	0	0	0
1	5964809	G	A	NPHP4	CM139068	Nephronophthisis-related ciliopathy	1	8895011	G	A	ortholog_one2one	96	96	1	132	0	0.996241	0.0037594	0	0	0	0	0	0	0	0	0	0	0	0	0	0	0	0	0.0151515	0	0	0
15	28267738	T	C	OCA2	CS951493	Albinism oculocutaneous II	7	6922582	T	C	ortholog_one2one	86	84	6	127	0	0.977444	0.0225564	0.25	0	0.166667	0	0.0714286	0	0	0	0	0	0	0	0	0	0	0	0	0	0	0
15	28326993	G	A	OCA2	CM031306	Albinism oculocutaneous II	7	6979339	G	A	ortholog_one2one	86	84	3	130	0	0.988722	0.0112782	0	0	0	0	0	0	0	0	0	0	0	0	0	0	0	0	0.030303	0	0.0714286	0
3	193311188	G	T	OPA1,ATP13A4	CM061155	Optic atrophy 1	2	185808358	G	T	ortholog_one2one,ortholog_one2one	98,97	99,91	3	130	0	0.988722	0.0112782	0	0	0	0	0	0	0	0	0	0	0.0294118	0	0	0	0.0263158	0	0.0151515	0	0	0
12	103237557	A	G	PAH	CM962547	Phenylketonuria	11	104014375	G	A	ortholog_one2one	98	98	1	132	0	0.996241	0.0037594	0	0	0	0	0	0	0	0	0	0	0	0	0	0	0	0	0.0151515	0	0	0
1	55524222	C	T	PCSK9	CM054796	Hypercholesterolaemia autosomal dominant	1	57907660	C	T	ortholog_one2one	88	87	1	132	0	0.996241	0.0037594	0.0833333	0	0	0	0	0	0	0	0	0	0	0	0	0	0	0	0	0	0	0
16	88800792	C	T	PIEZO	CM135024	Xerocytosis hereditary	20	86892502	C	T	ortholog_one2one	93	74	28	101	4	0.864662	0.135338	0	0	0	0	0.107143	0	0.285714	0	0.0714286	0	0.235294	2	0	0	0.157895	2	0.136364	0	0	0
1	20975021	G	A	PINK1,PINK1-AS,DDOST	CM065379	Parkinson disease autosomal recessive	1	23313520	G	A	ortholog_one2many,NA,ortholog_one2one	97,NA,93	97,NA,67	18	115	0	0.932331	0.0676692	0	0	0	0	0.0357143	0	0.107143	0	0.0714286	0	0.0588235	0	0.0833333	0	0.105263	0	0.0757576	0	0	0
16	2149896	C	T	PKD1	CM149576	Polycystic kidney disease autosomal dominant	20	2092476	C	T	ortholog_one2many	92	18	1	132	0	0.996241	0.0037594	0	0	0	0	0	0	0	0	0	0	0.0294118	0	0	0	0	0	0	0	0	0
6	51484235	G	A	PKHD1	CM100416	Polycystic kidney disease	4	51294013	G	A	ortholog_one2one	95	71	1	132	0	0.996241	0.0037594	0.0833333	0	0	0	0	0	0	0	0	0	0	0	0	0	0	0	0	0	0	0
20	43251552	G	A	PKIG,ADA	CM970060	Adenosine deaminase deficiency	10	19819209	C	T	ortholog_one2one,ortholog_one2one	99,96	99,96	1	132	0	0.996241	0.0037594	0.0833333	0	0	0	0	0	0	0	0	0	0	0	0	0	0	0	0	0	0	0
17	37822174	C	T	PNMT, STARD3,TCAP	CM091459	Cardiomyopathy hypertrophic	16	49761496	C	T	ortholog_one2one,ortholog_one2one,ortholog_one2one	81,98,99	95,98,99	11	121	1	0.951128	0.0488722	0	0	0	0	0	0	0	0	0.0357143	0	0.117647	0	0	0	0.0526316	0	0.0909091	1	0	0
10	72358477	C	T	PRF1	CM087862	Haemophagocytic lymphohistiocytosis familial	9	66409659	G	A	ortholog_one2one	95	95	30	102	1	0.879699	0.120301	0	0	0	0	0.178571	0	0.0357143	0	0.178571	0	0.176471	1	0.0833333	0	0.0789474	0	0.136364	0	0.142857	0
12	42862585	C	T	PRICKLE1	CM110954	Myoclonus epilepsy	11	39397264	C	T	ortholog_one2one	100	100	1	132	0	0.996241	0.0037594	0	0	0	0	0	0	0	0	0	0	0	0	0	0	0	0	0.0151515	0	0	0
7	142459791	G	A	PRSS1	CM011004	Pancreatitis hereditary	3	180314684	G	A	ortholog_one2many	87	87	49	73	11	0.733083	0.266917	0.0833333	0	0	0	0.25	2	0.357143	2	0.321429	0	0.235294	1	0.333333	0	0.236842	2	0.272727	3	0.357143	1
7	142459659	G	A	PRSS1	CM011001	Pancreatitis hereditary	3	180314552	A	G	ortholog_one2many	87	87	60	58	15	0.661654	0.338346	0.0833333	0	0	0	0.321429	2	0.392857	2	0.321429	0	0.294118	1	0.333333	0	0.394737	4	0.393939	5	0.357143	1
1	198687396	A	T	PTPRC	CM125666	Immunodeficiency severe combined	1	171779362	T	A	ortholog_one2one	88	86	2	131	0	0.992481	0.0075188	0	0	0	0	0.0357143	0	0	0	0	0	0	0	0	0	0	0	0.0151515	0	0	0
2	109369930	A	G	RANBP2	CM090150	Encephalopathy acute necrotising	13	108553372	A	G	ortholog_one2many	96	96	1	132	0	0.996241	0.0037594	0	0	0.166667	0	0	0	0	0	0	0	0	0	0	0	0	0	0	0	0	0
1	2340118	G	A	RER1,PEX10	CM981515	Neonatal adrenoleukodystrophy	1	5477905	G	A	ortholog_one2one,ortholog_one2one	91,95	99,95	1	132	0	0.996241	0.0037594	0	0	0	0	0	0	0	0	0	0	0	0	0	0	0.0263158	0	0	0	0	0
13	78492734	C	T	RNF219-AS1,EDNRB	CR961725	Hirschsprung disease	17	58409917	C	T	NA,ortholog_one2one	NA,98	NA,95	22	110	1	0.909774	0.0902256	0	0	0	0	0.107143	0	0.178571	1	0.0357143	0	0.117647	0	0.166667	0	0.0526316	0	0.0909091	0	0.0714286	0
19	39062846	G	A	RYR1	CM064219	Malignant hyperthermia	19	44914019	G	A	ortholog_one2many	99	7	1	132	0	0.996241	0.0037594	0	0	0	0	0	0	0	0	0	0	0	0	0	0	0.0263158	0	0	0	0	0
12	108924063	C	T	SART3,FICD	CM051219	Disseminated superficial actinic porokeratosis	11	109539672	C	T	ortholog_one2one,ortholog_one2one	99,97	99,98	17	110	6	0.890977	0.109023	0	0	0	0	0.0357143	0	0.0714286	0	0.285714	3	0.0882353	0	0.166667	0	0.0789474	1	0.121212	2	0.142857	0
2	166850896	C	T	SCN1A	CM096155	Dravet syndrome	12	29636781	C	T	ortholog_one2one	99	95	1	132	0	0.996241	0.0037594	0	0	0.166667	0	0	0	0	0	0	0	0	0	0	0	0	0	0	0	0	0
3	38622756	C	T	SCN5A	CM067021	Brugada syndrome	2	97952853	G	A	ortholog_one2one	94	94	1	132	0	0.996241	0.0037594	0	0	0	0	0	0	0	0	0	0	0	0	0.0833333	0	0	0	0	0	0	0
3	38591991	G	A	SCN5A	CM097850	Long QT syndrome	2	97985355	C	T	ortholog_one2one	94	94	1	132	0	0.996241	0.0037594	0.0833333	0	0	0	0	0	0	0	0	0	0	0	0	0	0	0	0	0	0	0
3	38645489	C	T	SCN5A	CM097640	Long QT syndrome	2	97929804	G	A	ortholog_one2one	94	94	1	132	0	0.996241	0.0037594	0	0	0.166667	0	0	0	0	0	0	0	0	0	0	0	0	0	0	0	0	0
2	167129241	G	A	SCN9A	CM066215	Paroxysmal extreme pain disorder	12	29926378	G	A	ortholog_one2one	98	98	5	128	0	0.981203	0.018797	0	0	0	0	0.0357143	0	0	0	0	0	0.0882353	0	0	0	0	0	0.0151515	0	0	0
16	23200963	G	A	SCNN1G	CM086916	Bronchiectasis	20	21655261	G	A	ortholog_one2one	92	98	1	132	0	0.996241	0.0037594	0.0833333	0	0	0	0	0	0	0	0	0	0	0	0	0	0	0	0	0	0	0
20	18492791	C	T	SEC23B	CS147738	Anaemia dyserythropoietic congenital type II	10	51847620	C	T	ortholog_one2one	99	99	2	131	0	0.992481	0.0075188	0	0	0.333333	0	0	0	0	0	0	0	0	0	0	0	0	0	0	0	0	0
15	74704267	G	A	SEMA7A	CM078704	JMH blood group variation	7	53212454	G	A	ortholog_one2one	98	98	1	132	0	0.996241	0.0037594	0	0	0	0	0.0357143	0	0	0	0	0	0	0	0	0	0	0	0	0	0	0
11	124519549	G	A	SIAE	CM104102	Autoimmune disease	14	122801342	G	A	ortholog_one2one	97	97	2	131	0	0.992481	0.0075188	0.0833333	0	0.166667	0	0	0	0	0	0	0	0	0	0	0	0	0	0	0	0	0
16	56917997	C	T	SLC12A3	CM002107	Gitelman syndrome	20	55238709	C	T	ortholog_one2one	97	97	4	129	0	0.984962	0.0150376	0	0	0	0	0	0	0	0	0	0	0	0	0	0	0.0526316	0	0.030303	0	0	0
16	56938301	G	A	SLC12A3,RPS24P17	CS121311	Gitelman syndrome	20	55259784	A	G	ortholog_one2one,NA	97,NA	97,NA	55	50	28	0.582707	0.417293	1	6	0.833333	2	0.357143	3	0.107143	0	0.5	2	0.470588	5	0.25	0	0.342105	1	0.424242	7	0.5	2
5	176829444	G	A	SLC34A1,F12,GRK6,PFN3	CM084809	Factor XII deficiency	6	173930129	G	A	ortholog_one2one,ortholog_one2one,ortholog_one2one,NA	97,94,99,NA	97,94,99,NA	2	131	0	0.992481	0.0075188	0	0	0	0	0	0	0	0	0	0	0	0	0	0	0.0263158	0	0	0	0.0714286	0
5	33963870	C	T	SLC45A2	CM051555	Pigmentation variation association with	6	34068325	C	T	ortholog_one2one	92	92	1	132	0	0.996241	0.0037594	0	0	0.166667	0	0	0	0	0	0	0	0	0	0	0	0	0	0	0	0	0
8	17358053	A	G	SLC7A2	CR123002	Infantile encephalopathy with anorexia	8	17385354	A	G	ortholog_one2one	90	85	3	130	0	0.988722	0.0112782	0.166667	0	0.166667	0	0	0	0	0	0	0	0	0	0	0	0	0	0	0	0	0
16	3652237	G	A	SLX4	CM136920	Breast and/or ovarian cancer	20	3732609	G	A	ortholog_one2many	86	8	1	132	0	0.996241	0.0037594	0	0	0	0	0	0	0	0	0	0	0.0294118	0	0	0	0	0	0	0	0	0
4	68610309	C	T	SNORA62,GNRHR,UBA6-AS1	CM100865	Kallmann syndrome	5	61628399	G	A	ortholog_one2one,ortholog_one2one,NA	93,97,NA	93,97,NA	50	71	12	0.721805	0.278195	0.25	0	0	0	0.392857	4	0.321429	1	0.357143	2	0.235294	1	0.25	0	0.342105	1	0.212121	2	0.214286	1
19	52196478	A	G	SPACA6P,MIR99B,SPACA6PAS,MIRLET7E,MIR125A	CR149523	Gastric cancer	19	57751474	A	G	NA,ortholog_one2one,NA,ortholog_one2one,ortholog_one2one	NA,100,NA,100,99	NA,100,NA,72,99	1	132	0	0.996241	0.0037594	0	0	0.166667	0	0	0	0	0	0	0	0	0	0	0	0	0	0	0	0	0
16	89574853	G	T	SPG7	CM041446	Spastic paraplegia	20	87628068	G	T	ortholog_one2one	97	42	17	114	2	0.921053	0.0789474	0.0833333	0	0.166667	0	0.107143	1	0.107143	1	0.0357143	0	0.0588235	0	0.0833333	0	0.105263	0	0.0454545	0	0.142857	0
11	6637981	C	T	TAF10,TPP1,DCHS1	CM050197	Neuronal ceroid lipofuscinosis late infantile	14	65586303	G	A	ortholog_one2one,ortholog_one2one,ortholog_one2one	99,98,98	99,98,98	2	131	0	0.992481	0.0075188	0	0	0	0	0	0	0	0	0.0714286	0	0	0	0	0	0	0	0	0	0	0
22	19743473	C	T	TBX1	CR140378	Indirect inguinal hernia	10	63803724	C	T	ortholog_one2one	64	42	42	84	7	0.789474	0.210526	0.0833333	0	0.166667	0	0.25	2	0.178571	1	0.25	1	0.147059	0	0.166667	0	0.236842	0	0.227273	2	0.285714	1
5	1272328	G	A	TERT	CM096690	Acute myeloid leukaemia	6	958714	G	A	ortholog_one2one	96	96	1	132	0	0.996241	0.0037594	0	0	0	0	0	0	0	0	0	0	0	0	0	0	0.0263158	0	0	0	0	0
22	33254009	G	A	TIMP3,SYN3	CM131007	Breast cancer non-BRCA1/BRCA2 related	10	76780438	G	A	ortholog_one2one,ortholog_one2one	63,99	75,99	2	131	0	0.992481	0.0075188	0	0	0	0	0	0	0	0	0	0	0	0	0	0	0.0263158	0	0.0151515	0	0	0
22	37494580	G	A	TMPRSS6	CM099535	Iron-refractory iron deficiency anaemia	10	80996769	G	A	ortholog_one2one	95	95	2	131	0	0.992481	0.0075188	0	0	0	0	0	0	0	0	0	0	0	0	0	0	0.0526316	0	0	0	0	0
6	32008648	C	T	TNXB,CYP21A2,C4B-AS1	CM022200	Adrenal hyperplasia	4	31665950	C	T	ortholog_one2one,ortholog_one2one,NA	80,96,NA	97,96,NA	18	115	0	0.932331	0.0676692	0.333333	0	0.5	0	0.107143	0	0	0	0.0357143	0	0.0294118	0	0	0	0.0263158	0	0.0757576	0	0	0
6	32008873	C	T	TNXB,CYP21A2,C4B-AS1	CM040415	Adrenal hyperplasia	4	31666175	C	T	ortholog_one2one,ortholog_one2one,NA	80,96,NA	97,96,NA	18	115	0	0.932331	0.0676692	0	0	0	0	0.0357143	0	0	0	0.0714286	0	0.0882353	0	0	0	0.0263158	0	0.136364	0	0.142857	0
11	18047154	C	T	TPH1	CM109146	Attention deficit hyperactivity disorder	14	53897690	G	A	ortholog_one2one	93	98	1	132	0	0.996241	0.0037594	0	0	0	0	0	0	0	0	0	0	0	0	0	0	0	0	0.0151515	0	0	0
6	18143853	C	T	TPMT	CM1314715	TPMT deficiency	4	18189978	C	T	ortholog_one2one	93	93	60	64	9	0.706767	0.293233	0.333333	0	0.333333	1	0.178571	0	0.428571	3	0.25	2	0.294118	1	0.166667	0	0.289474	1	0.318182	1	0.285714	0
6	18132367	A	G	TPMT	CM095228	TPMT deficiency	4	18179793	G	A	ortholog_one2one	93	93	71	37	25	0.545113	0.454887	0.333333	0	0	0	0.321429	0	0.607143	6	0.5	3	0.588235	5	0.333333	1	0.368421	2	0.484848	6	0.5	2
16	3713470	C	T	TRAP1,DNASE1	CM146035	Congenital anomalies of the kidney and urinary tract/CAKUT in VACTERL	20	3788851	C	T	ortholog_one2one,ortholog_one2one	94,95	89,95	1	132	0	0.996241	0.0037594	0	0	0	0	0	0	0.0357143	0	0	0	0	0	0	0	0	0	0	0	0	0
16	2120494	G	A	TSC2	CM122779	Tuberous sclerosis	20	2062094	G	A	ortholog_one2one	98	98	1	132	0	0.996241	0.0037594	0	0	0	0	0	0	0	0	0.0357143	0	0	0	0	0	0	0	0	0	0	0
17	73830155	C	T	UNC13D	CS102165	Haemophagocytic lymphohistiocytosis familial	16	71153796	C	T	ortholog_one2one	98	98	1	132	0	0.996241	0.0037594	0	0	0	0	0	0	0	0	0	0	0.0294118	0	0	0	0	0	0	0	0	0
17	73836585	C	T	UNC13D	CS080749	Juvenile idiopathic arthritis	16	71160253	C	T	ortholog_one2one	98	98	1	131	1	0.988722	0.0112782	0.166667	1	0	0	0.0357143	0	0	0	0	0	0	0	0	0	0	0	0	0	0	0
22	24919647	G	A	UPB1	CM123545	Beta-ureidopropionase deficiency	10	67938457	G	A	ortholog_one2one	97	98	1	132	0	0.996241	0.0037594	0	0	0	0	0.0357143	0	0	0	0	0	0	0	0	0	0	0	0	0	0	0
1	216074169	C	T	USH2A	CM124871	Retinitis pigmentosa	1	154515321	G	A	ortholog_one2one	96	29	12	121	0	0.954887	0.0451128	0	0	0	0	0	0	0.0357143	0	0.107143	0	0.0294118	0	0	0	0.0789474	0	0.0606061	0	0	0
3	38051436	G	A	VILL,Y_RNA,PLCD1	CM1111530	Leukonychia	2	98533321	C	T	ortholog_one2one,ortholog_one2one,ortholog_one2one	94,91,99	94,91,99	14	119	0	0.947368	0.0526316	0	0	0	0	0	0	0.142857	0	0	0	0	0	0	0	0.105263	0	0.0606061	0	0.142857	0
12	6078370	G	A	VWF	CS034154	Von Willebrand disease 3	11	6083736	G	A	ortholog_one2one	92	92	55	54	24	0.612782	0.387218	0.166667	0	0	0	0.285714	2	0.357143	2	0.464286	4	0.470588	2	0.333333	1	0.421053	3	0.393939	8	0.571429	2
12	6234258	G	A	VWF	CR070431	Von Willebrand disease 1	11	6238534	A	G	ortholog_one2one	92	92	67	27	39	0.454887	0.545113	0.666667	3	1	3	0.5	3	0.642857	5	0.571429	5	0.470588	3	0.416667	1	0.552632	5	0.469697	7	0.714286	4
5	110428276	A	G	WDR36	CM080627	Glaucoma primary open angle	6	107375711	G	A	ortholog_one2one	99	98	48	77	8	0.759398	0.240602	0.333333	1	0.166667	0	0.142857	0	0.0714286	0	0.214286	1	0.411765	4	0.333333	0	0.263158	0	0.227273	1	0.285714	1
10	31810350	A	G	ZEB1	CM080639	Posterior polymorphous corneal dystrophy	9	31700619	A	G	ortholog_one2one	99	95	1	132	0	0.996241	0.0037594	0.0833333	0	0	0	0	0	0	0	0	0	0	0	0	0	0	0	0	0	0	0
16	88496577	C	T	ZNF469	CM149223	Keratoconus	20	86579539	C	T	NA	NA	NA	27	102	4	0.868421	0.131579	0.0833333	0	0	0	0.142857	1	0.0714286	0	0.0714286	0	0.235294	1	0	0	0.131579	1	0.181818	1	0.0714286	0
1	91404897	T	C	ZNF644	CM115065	High myopia	1	93645748	T	C	ortholog_one2one	99	98	1	132	0	0.996241	0.0037594	0.0833333	0	0	0	0	0	0	0	0	0	0	0	0	0	0	0	0	0	0	0
